# Supplementary material for: Cell-secreted extracellular matrix, independent of cell source, promotes the osteogenic differentiation of human stromal vascular fraction
Source: Royal Society of Chemistry journal article supplement (doi:10.1039/c7tb02787g), 2018-01-01
Supplement: c7tb02787g1.pdf [file c7tb02787g1.pdf]

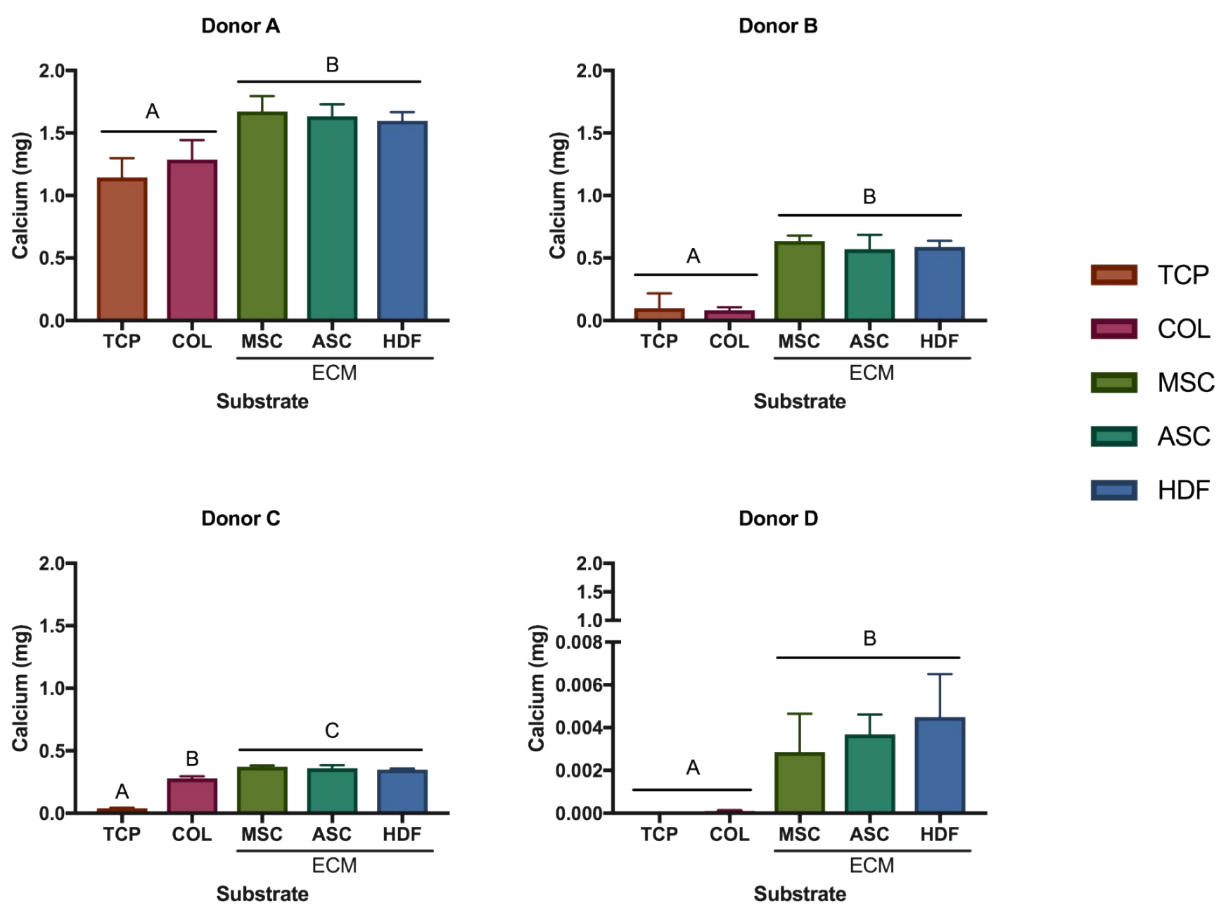

**Supplementary Figure 1. ECM enhances osteogenic differentiation across multiple SVF donors.** Total calcium deposition by individual SVF donors after 14 days in osteoinductive medium (n=4).
